# Supplementary material for: Direct manipulation of particle size and morphology of ordered mesoporous silica by flow synthesis
Source: Royal Society of Chemistry journal article supplement (doi:10.1039/c4ra16679e), 2015-01-01
Supplement: c4ra16679e1.pdf [file c4ra16679e1.pdf]

## SUPPORTING INFORMATION

### Direct Manipulation of Particle Size and Morphology of Ordered Mesoporous Silica by Flow Synthesis

T. N. Ng<sup>a,b</sup>, X. Q. Chen<sup>a,c</sup>, and K. L. Yeung<sup>a,d</sup>

<sup>a</sup>Department of Chemical and Biomolecular Engineering, <sup>b</sup>Energy Technology Concentration Program, <sup>d</sup>Division of Environment, the Hong Kong University of Science and Technology, Clear Water Bay, Kowloon, Hong Kong SAR, P.R. China.  
<sup>c</sup>Shanghai Advanced Research Institute, Chinese Academy of Science, Shanghai, P.R. China

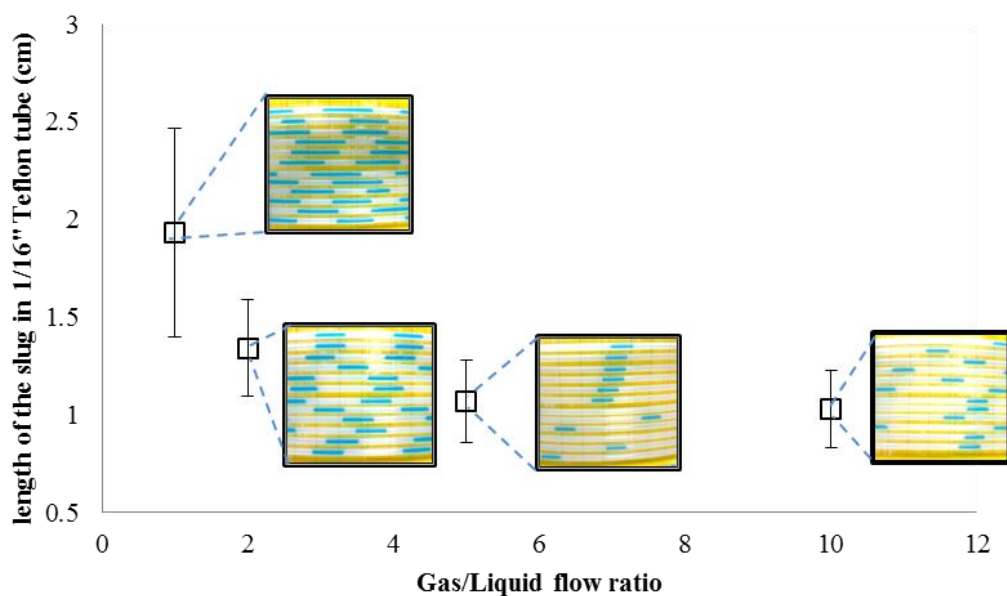

Figure S1 Length of the liquid slug in stable Taylor flow as a function of  $U_{GS}/U_{LS}$ .

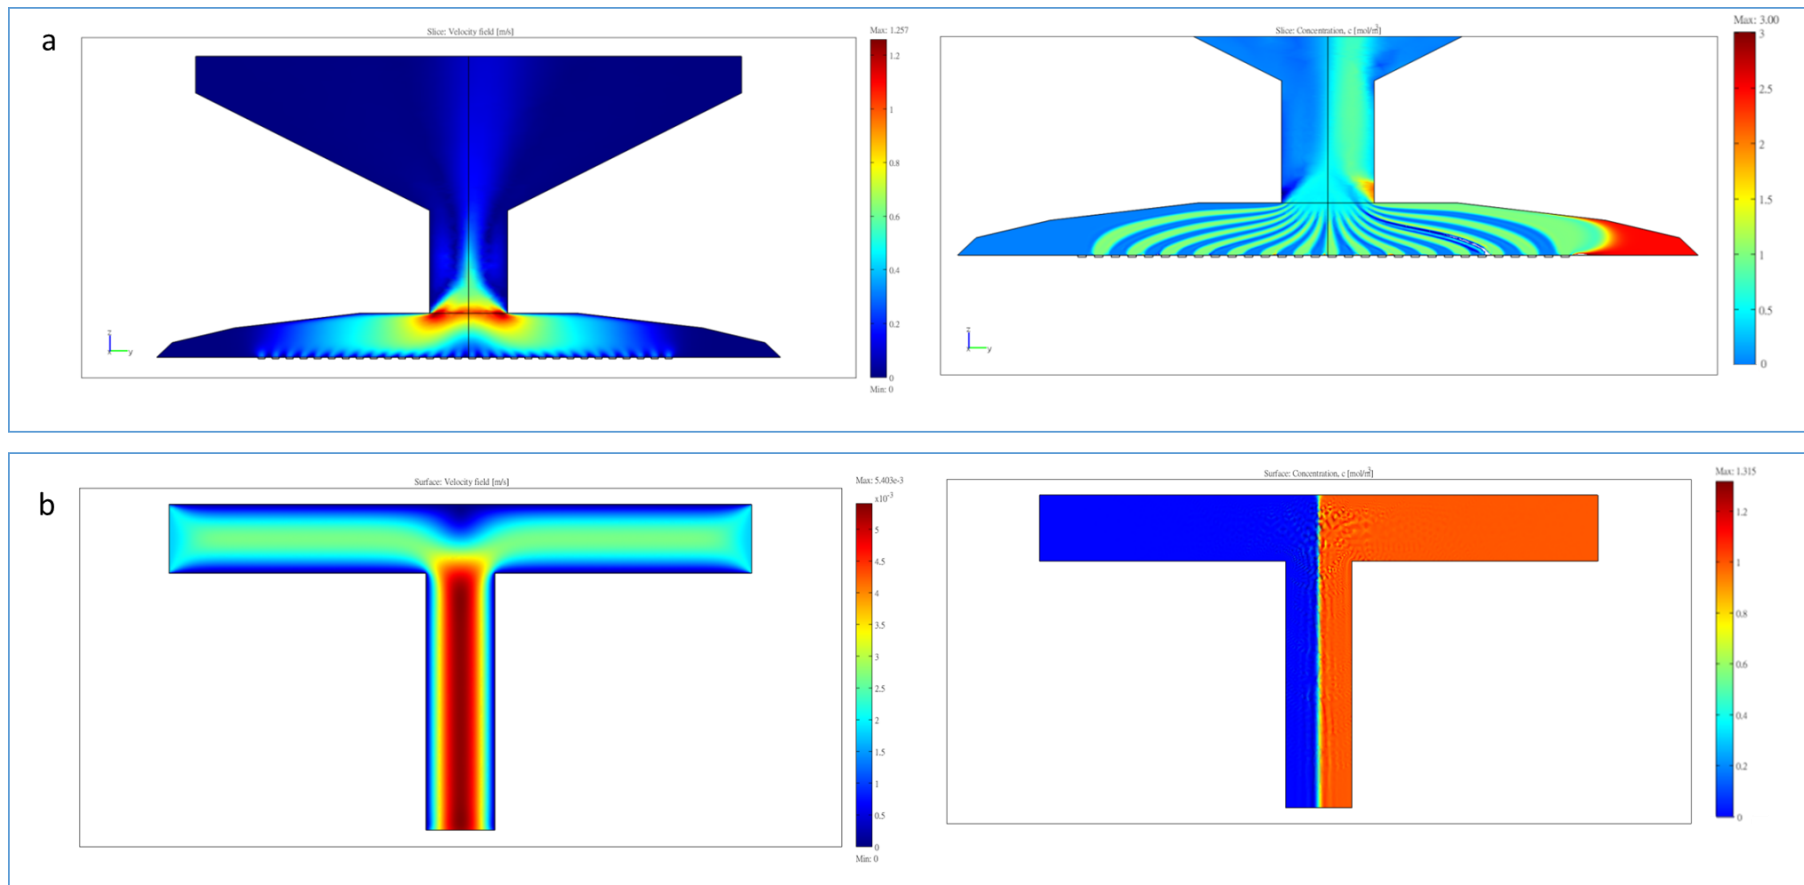

Figure S2 CFD simulation of flow velocity (*left*) and reactant concentration (*right*) profiles for a) SIM micromixer and b) T-mixer under balanced flow conditions in the absence of reaction.

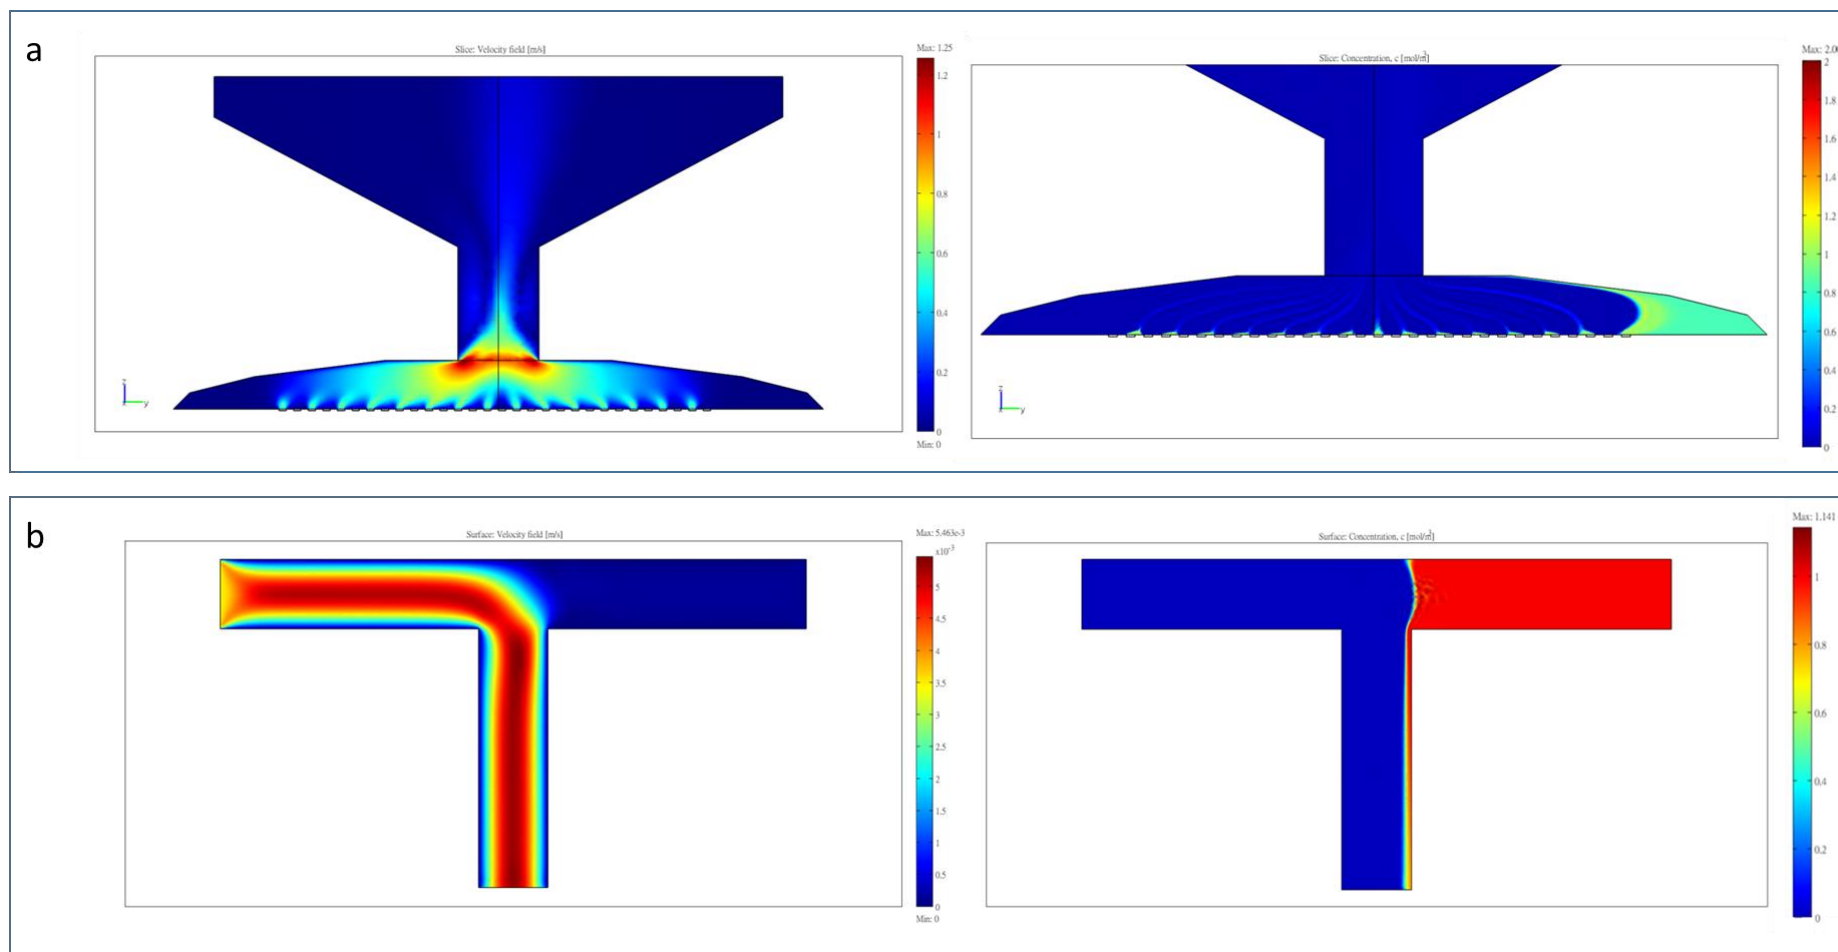

Figure S3 CFD simulation of flow velocity (*left*) and reactant concentration (*right*) profiles for a) SIM micromixer and b) T-mixer under unbalanced flow conditions (40:1) in the absence of reaction.

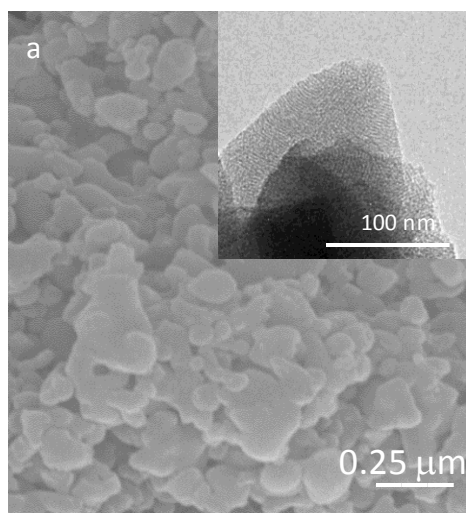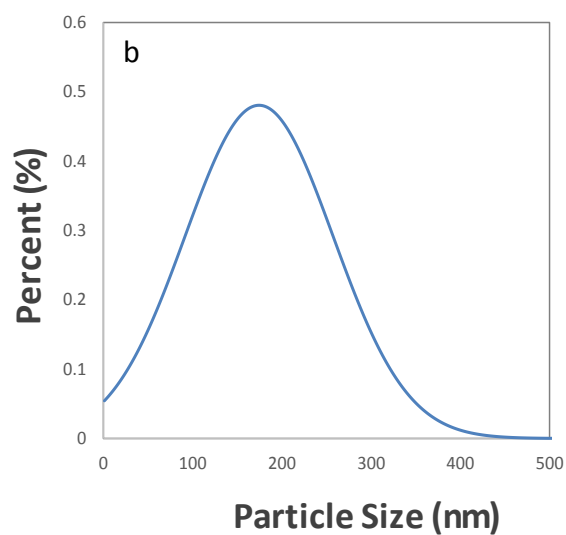

Figure S4 a) SEM image of OMS particles prepared from TMASi under balanced flow conditions, the inset TEM image shows the solids are mesoporous, and b) the particle size distribution of the sample.

---

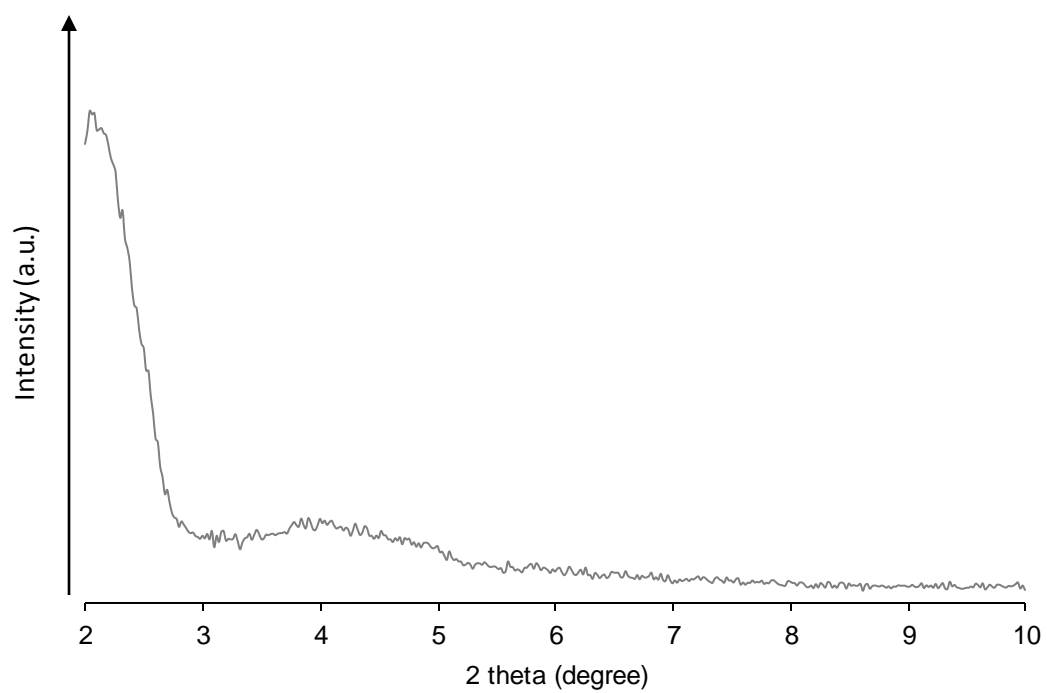

Figure S5. XRD of OMS sample prepared in batch with DMHA as co-solute at 0°C.

---
